# 1 **A large-scale analysis of bioinformatics code on**

## 2 **GitHub**

3

4

5 Pamela H Russell<sup>1\*</sup>, Rachel L Johnson<sup>1</sup>, Shreyas Ananthan<sup>2</sup>, Benjamin Harnke<sup>3</sup>, Nichole E

6 Carlson<sup>1</sup>

7

8 <sup>1</sup> Department of Biostatistics and Informatics, Colorado School of Public Health, Aurora, CO, USA

9 <sup>2</sup> High-Performance Algorithms and Complex Fluids, National Renewable Energy Laboratory, Golden,

10 CO, USA

11 <sup>3</sup> Health Sciences Library, University of Colorado Anschutz Medical Campus, Aurora, CO, USA

12

13 \* Corresponding author

14 E-mail: [pamela.russell@ucdenver.edu](mailto:pamela.russell@ucdenver.edu)

15

16

17

## 18 **Abstract**

19

20 In recent years, the explosion of genomic data and bioinformatic tools has been accompanied  
21 by a growing conversation around reproducibility of results and usability of software. However,  
22 the actual state of the body of bioinformatics software remains largely unknown. The purpose of  
23 this paper is to investigate the state of source code in the bioinformatics community, specifically  
24 looking at relationships between code properties, development activity, developer communities,  
25 and software impact. To investigate these issues, we curated a list of 1,720 bioinformatics  
26 repositories on GitHub through their mention in peer-reviewed bioinformatics articles.

27 Additionally, we included 23 high-profile repositories identified by their popularity in an online  
28 bioinformatics forum. We analyzed repository metadata, source code, development activity, and  
29 team dynamics using data made available publicly through the GitHub API, as well as article  
30 metadata. We found key relationships within our dataset, including: certain scientific topics are  
31 associated with more active code development and higher community interest in the repository;  
32 most of the code in the main dataset is written in dynamically typed languages, while most of  
33 the code in the high-profile set is statically typed; developer team size is associated with  
34 community engagement and high-profile repositories have larger teams; the proportion of  
35 female contributors decreases for high-profile repositories and with seniority level in author lists;  
36 and, multiple measures of project impact are associated with the simple variable of whether the  
37 code was modified at all after paper publication. In addition to providing the first large-scale  
38 analysis of bioinformatics code to our knowledge, our work will enable future analysis through  
39 publicly available data, code, and methods. Code to generate the dataset and reproduce the  
40 analysis is provided under the MIT license at [https://github.com/pamelarussell/github-](https://github.com/pamelarussell/github-bioinformatics)  
41 [bioinformatics](https://github.com/pamelarussell/github-bioinformatics). Data are available at <https://doi.org/10.17605/OSF.IO/UWHX8>.

42

43

## 44 **Author summary**

45

46 We present, to our knowledge, the first large-scale analysis of bioinformatics source code. The  
47 purpose of our work is to contribute data to the growing conversation in the bioinformatics  
48 community around reproducibility, code quality, and software usability. We analyze a large  
49 collection of bioinformatics software projects, identifying relationships between code properties,  
50 development activity, developer communities, and software impact. Throughout the work, we  
51 compare the large set of projects to a small set of highly popular bioinformatics tools,  
52 highlighting features associated with high-profile projects. We make our data and code publicly  
53 available to enable others to build upon our analysis or generate new datasets. The significance  
54 of our work is to (1) contribute a large base of knowledge to the bioinformatics community about  
55 the state of their software, (2) contribute tools and resources enabling the community to conduct  
56 their own analyses, and (3) demonstrate that it is possible to systematically analyze large  
57 volumes of bioinformatics code. This work and the provided resources will enable a more  
58 effective, data-driven conversation around software practices in the bioinformatics community.

59

60

61

## 62 Introduction

63

64 Bioinformatics is broadly defined as the application of computational techniques to analyze  
65 biological data. Modern bioinformatics can trace its origins to the 1960s, when improved access  
66 to digital computers coincided with an expanding collection of amino acid sequences and the  
67 recognition that macromolecules encode information [1]. The field underwent a transformation  
68 with the advent of large-scale DNA sequencing technology and the availability of whole genome  
69 sequences such as the draft human genome in 2001 [2]. Since 2001, not only the volume but  
70 also the types of available data have expanded dramatically. Today, bioinformaticians routinely  
71 incorporate whole genomes or multiple whole genomes, high-throughput DNA and RNA  
72 sequencing data, large-scale genetic studies, data addressing macromolecular structure and  
73 subcellular organization, and proteomic information [3].

74

75 Some debate has centered around the difference between “bioinformatics” and “computational  
76 biology”. One common opinion draws a distinction between bioinformatics as tool development  
77 and computational biology as science [4]. However, no consensus has been reached, nor is it  
78 clear whether one is needed. The terms are often used interchangeably, as in the  
79 “Computational biology and bioinformatics” subject area of *Nature* journals, described as “an  
80 interdisciplinary field that develops and applies computational methods to analyse large  
81 collections of biological data” [5]. In this article we use the umbrella term “bioinformatics” to refer  
82 to the development of computational methods and tools to analyze biological data.

83

84 In recent years, the explosion of genomic data and bioinformatic tools has been accompanied  
85 by a growing conversation around reproducibility of results and usability of software [6–9].  
86 Reproducibility requires that authors publish original data and a clear protocol to allow repetition

87 of the analysis in a paper [7]. Usability refers to ease and transparency of installation and  
88 usage. Version control systems such as Git and Subversion, which allow developers to track  
89 changes to code and maintain an archive of all old versions, are widely accepted as essential to  
90 the effective development of all non-trivial modern software. In particular, transparent version  
91 control is important for long-term reproducibility and usability in bioinformatics [6–9].

92  
93 The dominant version control system today is the open source distributed system Git [10], used  
94 by 87.2% of respondents to the 2018 Stack Overflow Developer Survey [11]. A Git “repository”  
95 is a directory that has been placed under version control, containing files along with all tracked  
96 changes. A “commit” is a snapshot of tracked changes that is preserved in the repository;  
97 developers create commits each time they wish to preserve a snapshot. Many online sharing  
98 sites host Git repositories, allowing developers to share code publicly and collaborate effectively  
99 with team members. GitHub [12] is a tremendously popular hosting service for Git repositories,  
100 with 24 million users across 200 countries and 67 million repositories in 2017 [13]. Since its  
101 initial launch in 2008, GitHub has grown in popularity within the bioinformatics field, as  
102 demonstrated by the proportion of articles in the journal *Bioinformatics* mentioning GitHub in the  
103 abstract (Fig 1). For an excellent explanation of Git and GitHub including additional definitions,  
104 see [14].

105

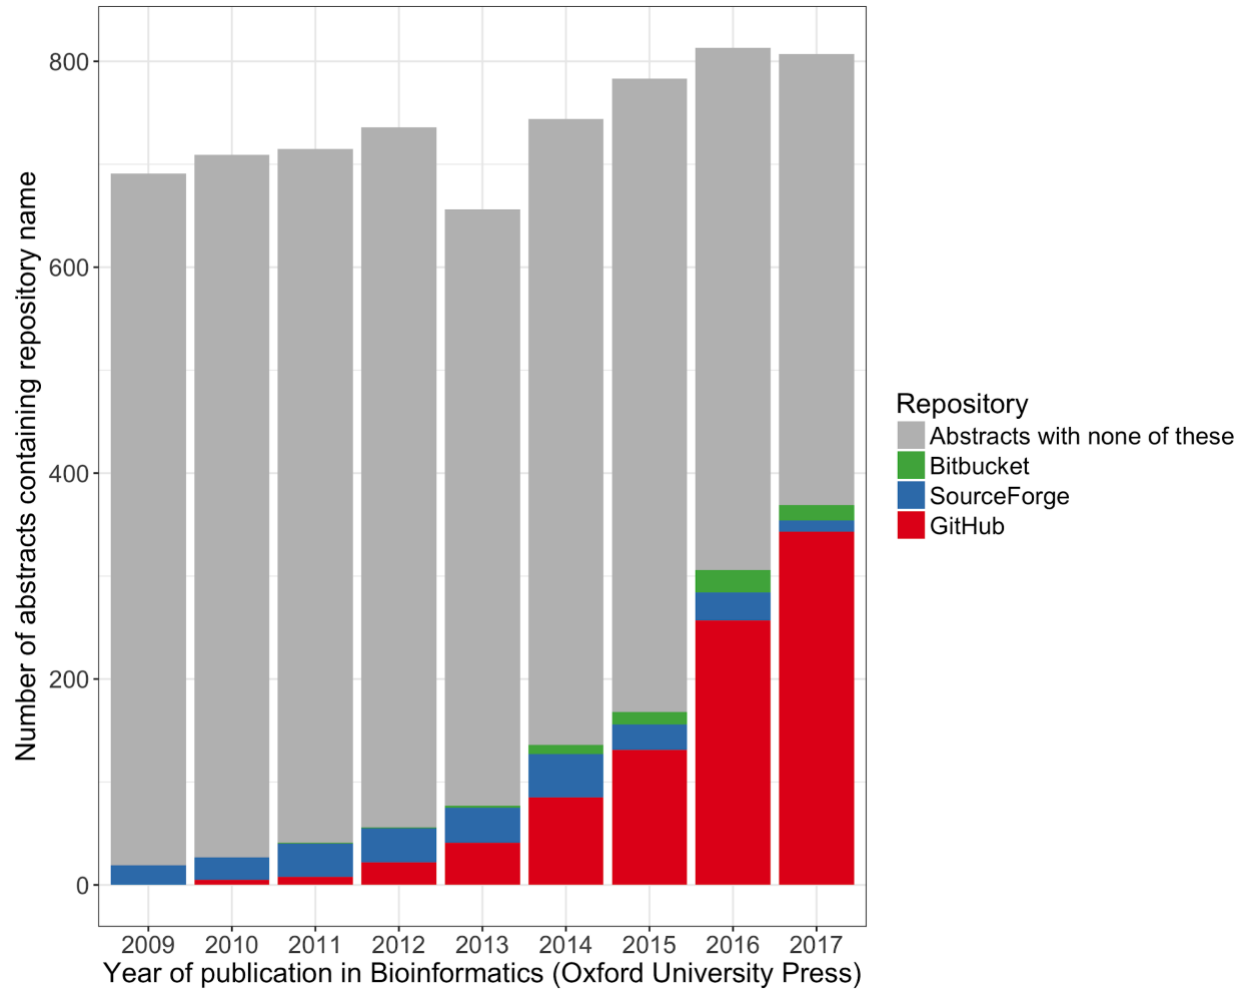

106

107 **Fig 1. Source code repositories in the journal *Bioinformatics*.** Here the term “repository”  
108 refers to online code hosting services. The journal *Bioinformatics* publishes new developments  
109 in bioinformatics and computational biology. If a paper focuses on software development,  
110 authors are required to state software availability in the abstract, including the complete URL  
111 [15]. URLs for software hosted on the popular services GitHub, Bitbucket, and SourceForge  
112 contain the respective repository name except in rare cases of developers referring to the  
113 repository from a different URL or page. The figure shows the results of PubMed searches for  
114 the repository names in the title or abstract of papers published in *Bioinformatics* between 2009  
115 and 2017. The category “Abstracts with none of these” captures all remaining articles published  
116 in *Bioinformatics* for the year, and likely includes many software projects hosted on organization

117 websites or featuring their own domain name, as well as any articles that did not publish  
118 software.

119

120 The bioinformatics field embraces a culture of sharing — for both data and source code — that  
121 supports rapid scientific and technical progress. In this paper, we present, to our knowledge, the  
122 first large-scale study of bioinformatics source code, taking advantage of the popularity of code  
123 sharing on GitHub. Our analysis data include 1,720 GitHub repositories published along with  
124 bioinformatics articles in peer-reviewed journals. Additionally, we have identified 23 “high-  
125 profile” GitHub repositories containing source code for popular and highly respected  
126 bioinformatic tools. We analyzed repository metadata, source code, development activity, and  
127 team dynamics using data made available publicly through the GitHub API [16]. We provide all  
128 scripts used to generate the dataset and perform the analysis, along with detailed instructions.  
129 We work within the GitHub Terms of Service [17] to make all data except personal identifying  
130 information publicly available, and provide instructions to reconstruct the removed columns if  
131 needed. Our main analysis results are provided as a table with over 400 calculated features for  
132 each repository.

133

134 Although the software engineering literature describes many analyses of GitHub data [18–24],  
135 bioinformatics software has not been looked at specifically. These software engineering studies  
136 often look only at highly active projects in wide community use, with many contributors utilizing  
137 the collaborative features of GitHub. Public bioinformatics software serves a variety of purposes,  
138 from analysis code supporting scientific results to polished tools intended for adoption by a wide  
139 audience. With exceptions, code bases published along with bioinformatics articles tend to be  
140 small, with one or a few contributors, and use GitHub mostly for its version control and public  
141 sharing features. Additionally, the interdisciplinary nature of bioinformatics creates a unique  
142 culture around programming, with developers bringing experience from diverse backgrounds

143 [25]. The projects in our dataset treat a variety of scientific topics, use many different  
144 programming languages, and show a diverse range of team dynamics.

145  
146 We describe our dataset from the perspective of the articles announcing the repositories, the  
147 source code itself, and the teams of developers. We observe several features that are  
148 associated with overall project impact. Our analysis points to simple recommendations for  
149 selecting bioinformatic tools from among the thousands available. Our dataset also contributes  
150 to and highlights the importance of the ongoing conversation around reproducibility and  
151 software quality.

152

153

## 154 **Results**

155

### 156 **A dataset of 1,740 bioinformatics repositories on GitHub**

157

158 We curated a set of 1,720 GitHub repositories mentioned in bioinformatics articles in peer-  
159 reviewed journals (referred to throughout the paper as the “main” dataset), as well as 23 high-  
160 profile repositories that were not necessarily on GitHub at the time of publication or are not  
161 published in journals. Three repositories overlapped between the two sets. As a resource for the  
162 community, we provide the full pipeline to extract all repository data from the GitHub API, all  
163 extracted data except personal identifying information, scripts to perform all analysis, and  
164 citations for the articles announcing each repository.

165

### 166 **Article topics**

167



168 We performed topic modeling [26] on the abstracts of the articles announcing each repository in  
169 the main dataset, associating each article with one or more topics. We manually assigned labels  
170 to each topic based on top associated terms (Fig S1); for example, the topic “Transcription and  
171 RNA-seq” is associated with the terms “rna”, “seq”, and “transcript”. We found that the topic  
172 “Web and graphical applications” was positively associated with several measures of project  
173 size and activity, as were, to a lesser extent, some other topics (Fig 2). We found that code for  
174 articles about certain topics was disproportionately written in certain languages; for example, the  
175 greatest amount of code for “Assembly and sequence analysis” was in C and C++, while the  
176 greatest amount of code for “Web and graphical applications” was in JavaScript (Fig S2).  
177 *Bioinformatics* was the most common journal for all topics, probably due in part to the relative  
178 ease of finding relevant projects in this journal (Fig S3). Fig S4 shows topic distribution by year  
179 of initial commit and article publication.

180

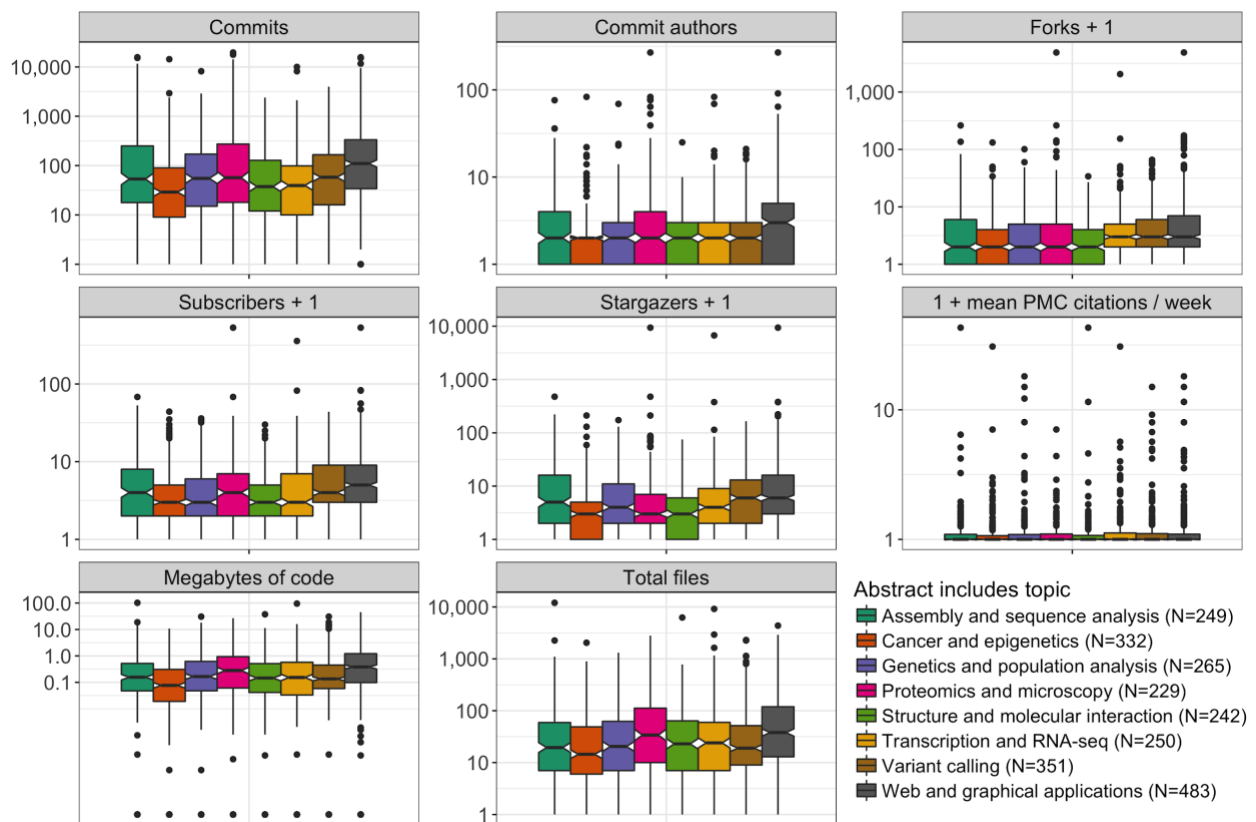

181

182 **Fig 2. Project features by article topic.** Projects are broken into groups according to whether  
183 the accompanying paper abstract is associated with each topic category. Projects that are  
184 associated with multiple topics are counted separately for each topic. Topic labels were  
185 assigned manually after examining top terms associated with each category. We added one to  
186 several variables to facilitate plotting on a log scale; these are noted in the variable name. All  
187 variables refer to the GitHub repository except “1 + mean PMC citations / week”, which refers to  
188 the paper and looks at citations in PubMed Central per week starting two years after the initial  
189 publication of the paper. Commits is the total number of commits to the default branch. Commit  
190 authors have created commits but do not necessarily have push access to the main branch; we  
191 attempted to collapse individuals with multiple aliases. Forks are individual copies of the  
192 repository made by community members. Subscribers are users who have chosen to receive  
193 notifications about repository activity. Stargazers are users who have bookmarked the  
194 repository as interesting. Megabytes of code and total files include source code only, excluding  
195 data file types such as JSON and HTML. The horizontal line at the center of the notch  
196 corresponds to the median. The lower and upper limits of the colored box correspond to the first  
197 and third quartiles. The whiskers extend beyond the hinges by at most an additional 1.5 times  
198 the inter-quartile range. Outliers are plotted individually. The notches correspond to roughly a  
199 95% confidence interval for comparing medians [27]. The table of repository features is provided  
200 as Table S8.

201

## 202 **Programming languages**

203

204 We identified a programming language for each source file and analyzed the prevalence of  
205 languages along several dimensions including total number of source files, lines of code, and  
206 size of source files in bytes. In high-profile repositories, the greatest amount of code in bytes  
207 was in Java, followed by C and C++. In the main dataset, two repositories contained entire

208 copies of the large C++ Boost libraries [28]. Ignoring those copies of Boost, the greatest amount  
209 of code in the main dataset was in Javascript, followed by Java, Python, C++, and C (Fig S5).  
210  
211 We analyzed language features including primary execution mode (interpreted or compiled),  
212 type system (static or dynamic, strong or weak), and type safety. High-profile repositories  
213 tended to emphasize compiled, statically typed languages, with the largest contribution being  
214 from Java. The main dataset contained a greater proportion of code written in interpreted or  
215 hybrid interpreted/compiled (such as Python) and dynamically typed languages (Fig 3, Fig S6,  
216 Table S6, Table S7). This difference could reflect the fact that interpreted and dynamically typed  
217 languages provide a powerful platform to quickly design prototypes for small projects, while  
218 static typing provides important safety checks for larger projects. Indeed, there was a  
219 relationship between project size (total lines of code) and amount of statically typed code  
220 (percentage of bytes in statically typed languages): the Spearman correlation between these  
221 variables over the entire dataset was 0.41 ( $P=2.2e-16$ ) (Table S8). Our data support the intuition  
222 that Java, Python and R are more succinct than lower-level languages such as C and C++, as  
223 the former group tended to have fewer lines of code per source file in the presumably  
224 sophisticated high-profile repositories (Fig 3).  
225

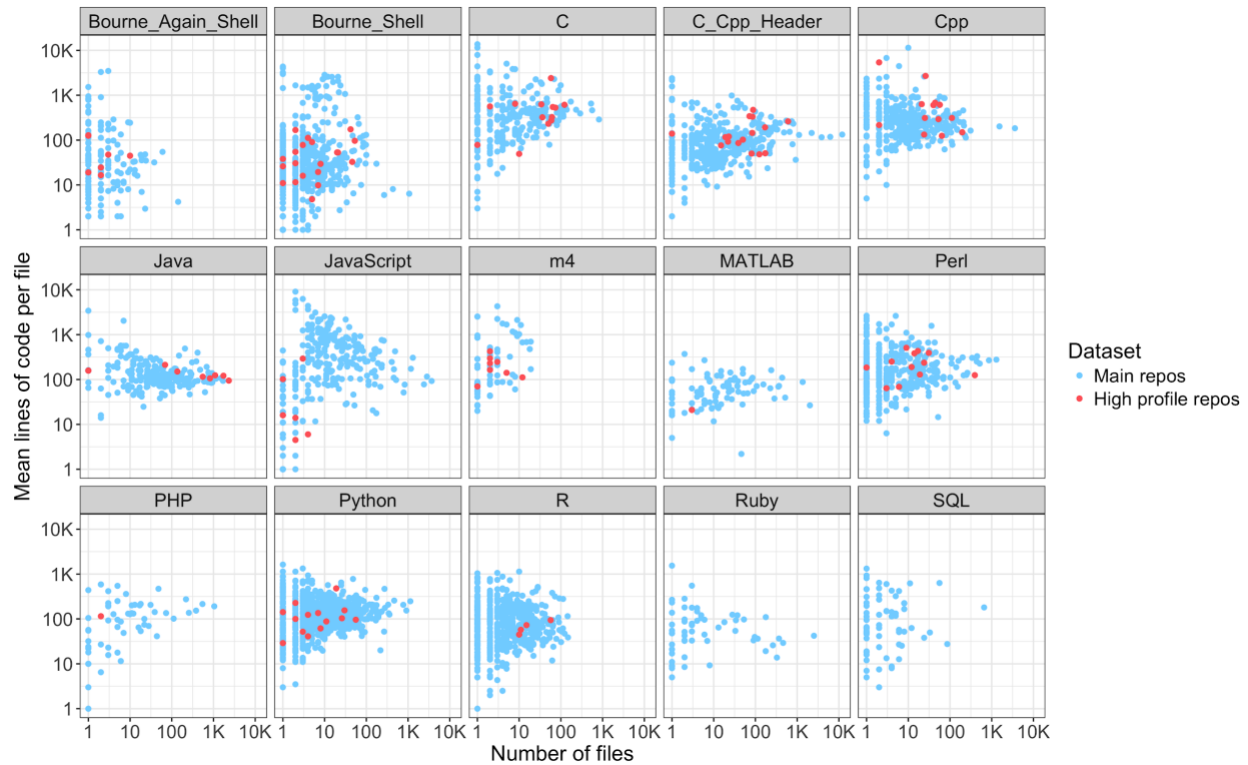

226

227 **Fig 3. Number and length of source files by programming language.** Languages included in  
228 at least 50 main repositories are shown. Each dot corresponds to one repository and indicates  
229 the number of files in the language and the mean number of lines of code per file not including  
230 comments. The data are provided as Table S8.

231

### 232 **Developer communities**

233

234 For version control systems such as Git, “commits” refer to batches of changes contributed by  
235 individual users; each commit causes a snapshot of the repository to be saved along with  
236 records of all changes. Each GitHub repository has a core team of developers with commit  
237 access; these developers can push changes directly to the repository. In addition, GitHub  
238 facilitates community collaboration through a system of forks and pull requests. Anyone can  
239 create a personal copy of a public repository, called a “fork”, and make arbitrary changes to their  
240 fork. If an outside developer feels their changes could benefit the main project, they can create

241 a “pull request”: a request for members of the core team to review and possibly merge their  
242 changes into the main project. In that case, the commit records for the main project would show  
243 the outside contributor as the commit author and the core team member who merged the  
244 changes as the committer.

245

246 We looked at the size of each developer team (including users with commit access and outside  
247 contributors) as well as other measures of community engagement, including number of forks,  
248 subscribers, and stargazers. Subscribers are users who have chosen to receive notifications  
249 about repository activity. Stargazers are users who have bookmarked the repository as  
250 interesting. Neither subscribers nor stargazers necessarily touch any code, though in practice  
251 they are likely to include the developer team. Not surprisingly, the size of the developer team (all  
252 commit authors) was strongly associated with the number of forks, subscribers, and stargazers.  
253 High-profile repositories tended to have larger teams and more community engagement by  
254 these measures (Fig 4). The number of outside contributors was also associated with these  
255 measures, though less strongly, perhaps because only 14% of main repositories had any  
256 outside contributors and these already tended to be within the highly active subset; 70% of high-  
257 profile repositories had outside contributors (Fig S7).

258

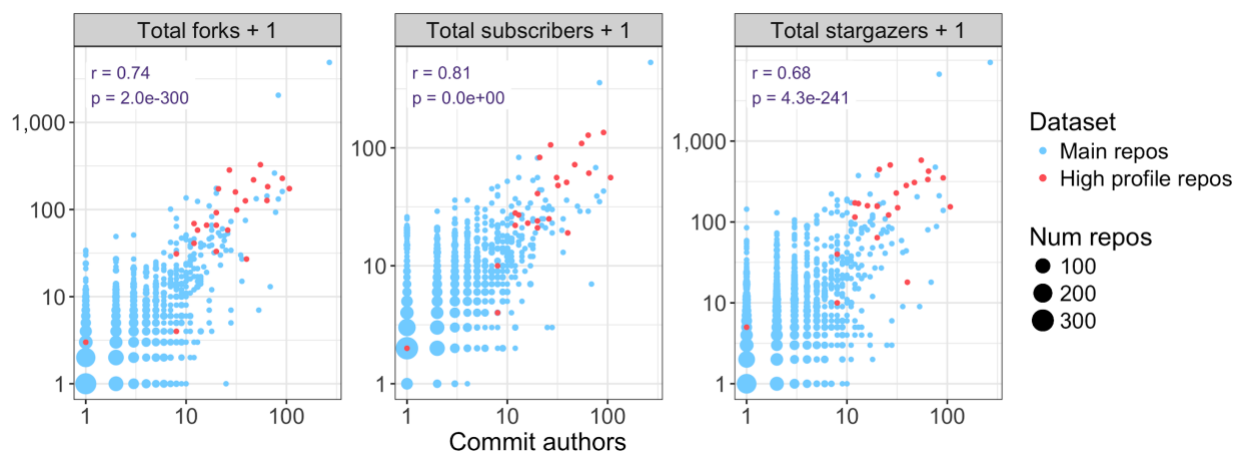

259

260 **Fig 4. Size of developer community.** Various measures of community engagement are plotted  
261 against the number of commit authors. Each dot represents one repository or a set of  
262 repositories with identical values for the variables. We added one to the vertical axis variables to  
263 facilitate plotting on a log scale due to many zero values. The pearson correlation and  
264 associated p-value are displayed for each variable versus number of commit authors. Commit  
265 authors refers to the number of unique commit authors to the default branch. The high-profile  
266 repository with a single contributor is s-andrews/FastQC [29]. This repository appears to have  
267 been created by a single developer importing a previously existing code base to GitHub. The  
268 table of repository features is provided as Table S8.

269

#### 270 **Gender distribution of developers and article authorships**

271

272 We analyzed the gender distribution of developers and article authorships in the dataset as a  
273 whole and within teams. Developer and author first names were submitted to the Genderize.io  
274 API [30] and high-confidence gender calls were counted. We found that the proportion of female  
275 authors decreased with seniority in author lists and the proportion of female developers was  
276 lower in high-profile repositories compared to the main dataset. In the main dataset, 12% of  
277 developers were women while only 6% of commits were contributed by women; these numbers  
278 were lower in the high-profile dataset (7% and 2%, respectively). In biology articles, it is  
279 customary to list the lead author first and the senior author last, with additional authors in the  
280 middle. We found that in the articles announcing each repository, middle authors included the  
281 greatest proportion of women. Women comprised 22% of all authorships in the main dataset  
282 and 21% in the high-profile dataset, compared to 18% and 0% for first authors and 14% and 8%  
283 (representing only one person) for the most senior last authors (Fig 5). A separate study of  
284 author gender in computational biology articles found a similar trend of decreased

285 representation of women with increased seniority in author lists; the authors additionally  
286 identified a pattern of more female authors on papers with a female last author [31].

287

288 We analyzed the gender composition of each team of developers and paper authors. The most  
289 common type of team in the main dataset was a single male developer and an all-male author  
290 list. The most common type of team in the high-profile dataset was a majority-male developer  
291 team and an all-male author list. Only ten main repositories and no high-profile repositories had  
292 all or majority female developer and author teams; all ten of these developer teams consisted of  
293 a single female developer (Fig S8).

294

295 We quantified gender diversity within teams using the Shannon index of diversity [32]. A  
296 Shannon index of 0 means all members have the same gender, while the maximum value of the  
297 Shannon index with two categories is  $\ln(2) = 0.69$ , achieved with equal representation of both  
298 categories. We found that 13% of main repositories and 62% of high-profile repositories had a  
299 nonzero Shannon index for the developer team. There were no high-profile repositories with a  
300 Shannon index greater than 0.4; the percentage of main repositories with Shannon index  
301 greater than 0.4 was 12% (Fig S9).

302

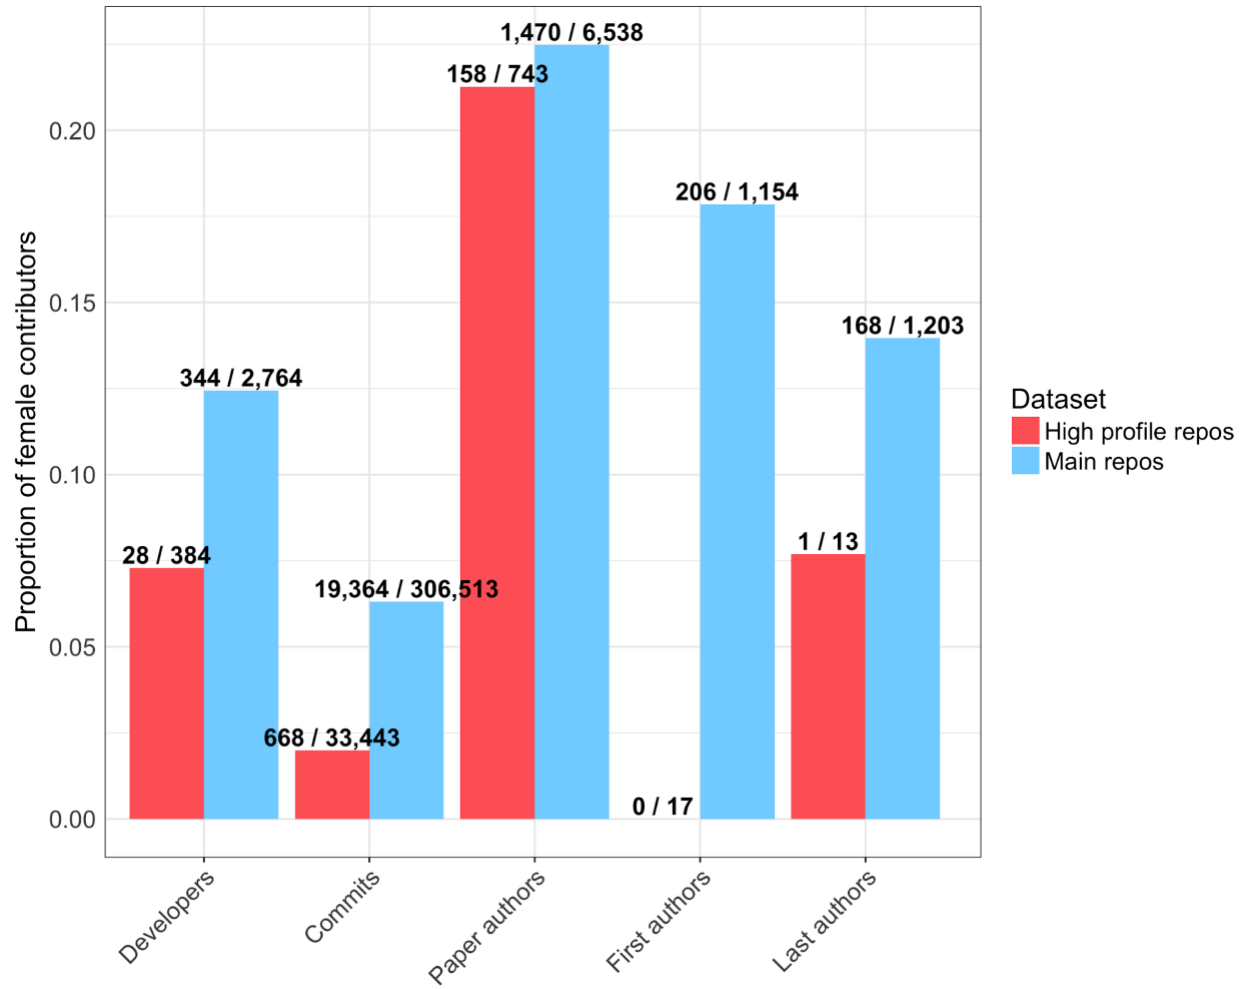

303

304 **Fig 5. Distribution of developers, commits and paper authorships by gender.** “Developers”

305 are unique commit authors or committers over the entire dataset; we attempted to collapse

306 individuals with multiple aliases. “Commits” are individual commits to default branches of

307 repositories. “Paper authors” are individual authorships on papers, not necessarily unique

308 people. For each repository, the one paper announcing the repository is included; papers were

309 then deduplicated because some papers announced multiple repositories. First and last authors

310 are only counted for papers with at least two authors. Names for which a gender could not be

311 inferred are excluded. Bar height corresponds to the number of female contributors divided by

312 the number of contributors with a gender call; these numbers are labeled above each bar. The

313 features for each repo are provided in Table S8.



314

## 315 Commit dynamics

316

317 We looked at several measures of commit timing along with total number of commits to each  
318 repository. Not surprisingly, the total number of commits was strongly associated with density of  
319 activity (commits per month and maximum consecutive months with commits) and overall  
320 project duration. High-profile repositories tended to have longer project duration and greater  
321 density of commit activity (Fig 6).

322

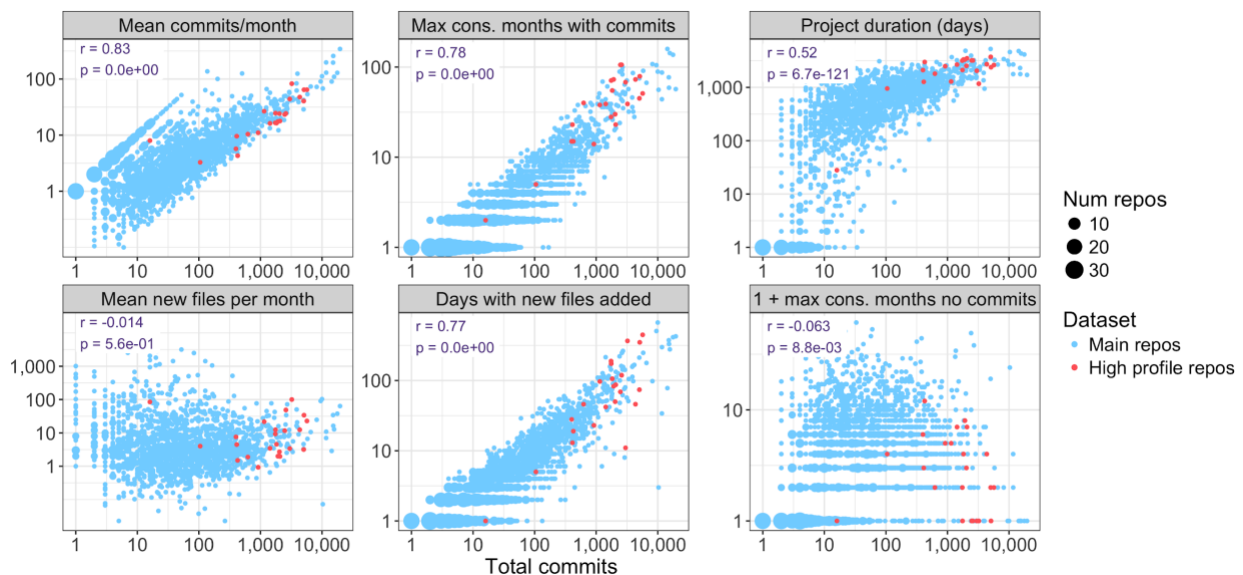

323

324 **Fig 6. Commit timing versus total commits.** Various timing dynamics are plotted versus total  
325 commits to the default branch. Each dot represents one repository or a set of repositories with  
326 identical values for the variables. For each variable, the total time interval covered by the project  
327 is the interval starting with the first commit and ending with the last commit at the time we  
328 accessed the data. For example, “Mean new files per month” counts only months from the first  
329 to last commit. The high-profile repository with only 16 commits and all files added on a single  
330 day is s-andrews/FastQC [29]. This repository appears to have been created by importing a  
331 previously existing code base to GitHub. The data are provided as Table S8.

332

### 333 **A simple proxy for project impact**

334

335 We looked at the simple binary feature of whether any commits were contributed to each  
336 repository after the associated article appeared in PubMed. We found that this simple feature  
337 was associated with several measures of project activity and impact (Fig 7). Not surprisingly, it  
338 was strongly associated with the total number of commits and size of the developer team.  
339 Presumably, larger projects tend to be those that are useful to many people and for which  
340 development continues after the paper is published. The metric was also associated with  
341 measures of community engagement such as forks, stargazers, and outside contributors. This  
342 could be explained in part by the previous point and in part by outside community members  
343 voluntarily becoming involved in the project after reading the paper. However, interestingly, the  
344 association with the proportion of commits contributed by outside authors was not statistically  
345 significant, suggesting that overall team size may be the principal feature driving the relationship  
346 with the number of outside commit authors. Additionally, the metric was associated with  
347 frequency of citations in PubMed Central, which could indicate that people are discovering the  
348 code through the paper and using it, and the code is therefore being maintained. Interestingly,  
349 repositories with commits after the paper was published had longer commit messages  
350 (explanations included by commit authors along with their changes to the repository). This could  
351 be due to a relationship between both variables and the size of the developer team; perhaps  
352 members of larger teams tend to write longer commit messages to meet the increased burden  
353 of communication with more team members. Indeed, there was a moderate linear relationship ( $r$   
354 = 0.14,  $p = 1.9e-09$ ) between total number of commit authors and mean commit message length  
355 in the main dataset.

356

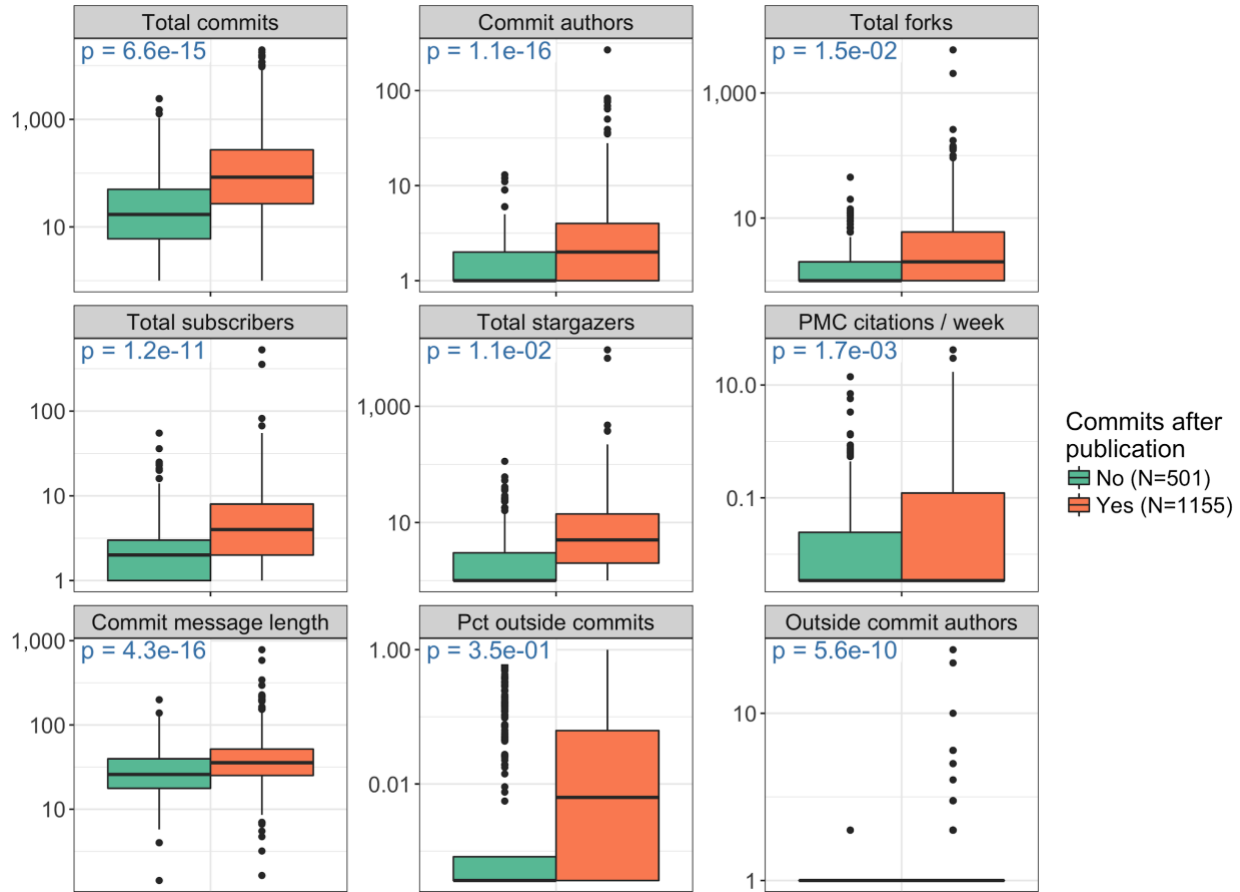

357

358 **Fig 7. Commits after paper publication.** Each data point contributing to each box plot is one  
359 repository in the main dataset. Repositories are separated by whether the last commit  
360 timestamp at the time we accessed the data was after the date the corresponding publication  
361 appeared in PubMed. Repositories for which we do not have a publication date in PubMed are  
362 excluded. See Fig 2 legend for the explanation of “Total commits”, “Commit authors”, “Total  
363 forks”, “Total subscribers”, “Total stargazers”, and “PMC citations / week”. “Commit message  
364 length” is the mean number of characters in a commit message. “Pct outside commits” is the  
365 proportion of commits with an author who is never a committer. “Outside commit authors” is the  
366 number of commit authors who are never committers. The p-value refers to the two-sided *t*-test  
367 for different means between the two groups. The data used to compute the p-value include zero  
368 values, but for the plot, we replaced zeros by the minimum positive value of each variable to  
369 facilitate plotting on a log scale. The horizontal line across the box corresponds to the median.

370 The lower and upper limits of the box correspond to the first and third quartiles. The whiskers  
371 extend beyond the box by at most an additional 1.5 times the inter-quartile range. Outliers are  
372 plotted individually. The table of repository features is provided as Table S8.

373

374

## 375 **Discussion**

376

377 We have presented the first large-scale analysis of bioinformatics code to our knowledge. Our  
378 analysis gives a high-level picture of the current state of software in bioinformatics, summarizing  
379 scientific topics, source code features, development practices, community engagement, and  
380 team dynamics. The culture of sharing in bioinformatics will continue to enable deeper study of  
381 software practices in the field. Our hope is that readers will uncover additional insights in our  
382 tables of hundreds of calculated features for each repository (Table S8), many of which were  
383 not analyzed in this paper, and that some readers will use or adapt our code to generate data  
384 and analyze repositories in unanticipated ways.

385

386 Interestingly, despite being made public on GitHub, nearly half of all repositories in our dataset  
387 do not feature explicit licenses (Fig S10), in most cases likely unintentionally restricting the  
388 rights of others to reuse and modify the code. Nonetheless, the type of research described here  
389 may proceed under the GitHub Terms of Service [17] and Privacy Statement [33].

390

391 With the overwhelming variety of public bioinformatics software available, users are constantly  
392 faced with the question of which tool to use. Several features of our analysis point to simple  
393 heuristics based on information available on GitHub. We observed relationships between  
394 community engagement and various measures of project size and activity level (Fig 4, Fig 6,

395 Fig S7). Our final analysis looked at the simple question of whether the developers had revisited  
396 their code at all after the paper was published; we found that this feature is associated with  
397 several measures of impact (Fig 7). Intuitively, these points suggest that users should prioritize  
398 software that is being consistently maintained by an active team of developers. The GitHub web  
399 interface prominently displays the total number of commits, number of contributors, and time of  
400 latest commit on the front page for each repository. Additionally, GitHub provides a full-featured  
401 mechanism, called Issues, that allows the developer team or any user to create tracked  
402 requests within the project. We did not analyze issues because these are a relatively advanced  
403 feature that is rarely used in our dataset; nonetheless, a consistent flow of issues can help  
404 identify sophisticated projects under active development.

405

406 Bioinformatics is a hybrid discipline combining biology and computer science. There are three  
407 major paths into the field: (1) computer scientists and programmers can become familiar with  
408 the relevant biology, (2) biologists can learn programming and data analysis, or (3) students can  
409 train specifically in increasingly popular bioinformatics programs [25]. Our dataset likely includes  
410 developers from all three major paths. However, our analysis of developer gender demonstrates  
411 that the gender distribution in bioinformatics more closely resembles that of computer science  
412 than biology. Indeed, the underrepresentation of women in our dataset was more extreme than  
413 among students awarded PhDs in computer science in the United States in 2016 [34]. A  
414 possible reason for this could be that, despite relatively high numbers of women in biology,  
415 biologists who make the transition to bioinformatics tend to be male. Another possible  
416 explanation could be that the subset of bioinformaticians who publish code on GitHub are  
417 disproportionately those from the computer science side. Importantly, our analysis does not  
418 address other intersections of identity and demographics that affect individuals' experience  
419 throughout the academic life cycle. Beyond simply pushing for fair treatment of all scientists,

420 researchers have argued that team diversity leads to increased productivity of software  
421 development and higher quality science [35–37].

422

### 423 **Limitations**

424

425 Our dataset represents a large cross section of bioinformatics code bases, but many projects  
426 are excluded for various reasons. First of all, due to the challenges of full-text literature search,  
427 we did not identify all articles in the biomedical literature that mention GitHub. In particular, we  
428 did not use the open access set of articles in PubMed Central because these included too many  
429 mentions of GitHub to manually curate for both bioinformatics topics and code being announced  
430 with the respective articles, and efforts to train automated classifiers left too many false  
431 positives that tended to skew the picture of repository properties compared to true  
432 announcements of bioinformatics code. We therefore selected a search strategy that was  
433 limited enough to generate a high-quality hand-curated set and could include papers that were  
434 not open access. Second, we are missing repositories that were not on GitHub at the time of  
435 publication or are primarily described on a main project website other than GitHub, with the  
436 exception of the high-profile repositories we added manually. Third, we have not included large  
437 open source collaborations such as Bioconductor [38], BioJava [39], and Biopython [40], due to  
438 project-specific substructure making it unfair to compare them to the rest of the dataset. Finally,  
439 our dataset could be biased due to our use of GitHub itself: it is possible that developers with  
440 certain backgrounds are disproportionately likely to host code on GitHub, while we have not  
441 analyzed any code not hosted on GitHub.

442

443 The spirit of sharing has led to an increase in popularity of preprints: advance versions of  
444 articles that have not yet been published in peer-reviewed journals. Preprints can allow scientific  
445 progress to continue during the sometimes extensive review process. However, we chose not to

446 include preprints in our literature search for three main reasons. First, we believed that  
447 successful peer review was a fair criterion on which to identify serious code bases. Second, we  
448 wanted to analyze article metadata that would only be available from databases such as  
449 PubMed. Third, the most popular preprint server for biology, bioRxiv [41], does not currently  
450 provide an API, putting programmatic access out of reach.

451

## 452 **Future research**

453

454 Several interesting future analyses are possible with our dataset or extensions to it. First, we did  
455 not examine the important topic of software documentation, either within source code or for  
456 users. The myriad forms of user documentation (README files, help menus, wikis, web pages,  
457 forums, and so on) make this a difficult but important topic to study. Second, static code  
458 analysis would provide deep insight into software quality and style. While impractical for a large  
459 heterogeneous set of code bases written in many different languages, future studies could  
460 uncover valuable insights through focused static analysis of repositories sharing common  
461 features. Third, we did not study the behavior of individual developers in depth. Future studies  
462 could analyze the social and coding behavior of individuals across all their projects and interests  
463 on GitHub. Finally, our analysis does not address the important question of software validity:  
464 whether a program correctly implements its stated specification and produces the expected  
465 results. The complexity of bioinformatic analysis makes validity testing a very challenging  
466 problem. Nevertheless, progress has been made in this area [42–44]. Our hope is that others  
467 will leverage our work to answer further important questions about bioinformatics code.

468

## 469 **Toward better bioinformatics software**

470

471 Our work provides data to enhance the ongoing community-wide conversation around  
472 reproducibility and software quality in bioinformatics. Several features of our data suggest a  
473 need for community-wide software standards, including the widespread absence of open source  
474 licenses (46% of main repositories have no detectable license), the number of repositories not  
475 appearing to use version control effectively (12% of main repositories added all new files on a  
476 single day, while 40% have a median commit message length less than 20 characters), and the  
477 apparent lack of reuse of the software (28% of papers in the main dataset have never been  
478 cited by articles in PubMed Central, while 68% have fewer than five citations) (Table S8).  
479 Similarly, a study based on text mining found that over 70% of bioinformatics software  
480 resources described in PubMed Central were never reused [45]. These orthogonal lines of  
481 evidence support the need for the already growing efforts toward supporting better software in  
482 bioinformatics and scientific research in general.

483

484 Existing efforts to improve research software include the Software Sustainability Institute  
485 [46,47], which works toward a mission of improving software to enable more effective research;  
486 Better Scientific Software [48], a project that provides resources to improve scientific and  
487 engineering software; and Software Carpentry [49–51], which provides highly practical training  
488 for research computing. In addition, several reviews recommend specific practices for the  
489 software development lifecycle in academic science. In [8], the author provides specific  
490 recommendations to improve usability of command line bioinformatics software. The authors of  
491 [52] recommend specific software engineering practices for scientific computing. In [9], the  
492 authors outline several practices for the entire software development lifecycle. In [53], members  
493 of a small biology lab describe their efforts to bring better software development practices to  
494 their lab. In [54], the author advocates for changes at the institutional and societal levels that  
495 would lead to better software and better science.

496



497 Our contribution to this conversation, in addition to the specific conclusions from our analysis, is  
498 to demonstrate that it is possible to study bioinformatics software at the atomic level using hard  
499 data. With continued updates, this paradigm will enable a more effective, data-driven  
500 conversation around software practices in the bioinformatics community.

501

502

## 503 **Methods**

504

### 505 **Identification of bioinformatics repositories on GitHub**

506

507 GitHub repositories containing bioinformatics code were found through their mention in  
508 published journal articles pertaining to bioinformatics topics. Briefly, a literature search identified  
509 articles that were likely to pertain to bioinformatics topics and contained mentions of GitHub.  
510 Manual curation identified the subset of these articles treating bioinformatics topics, using a  
511 detailed definition of bioinformatics. GitHub repository names were automatically extracted from  
512 the bioinformatics articles. Mentions of each repository in each article were manually examined  
513 to identify repositories containing code for the paper, as opposed to mentions of outside  
514 repositories. Repository names were manually deduplicated and fixed for other noticeable  
515 issues such as inclusion of extra text due to the automatic parsing of context around the  
516 repository name. Repository names were automatically checked for validity using the GitHub  
517 API, and repositories with issues in this check were manually fixed or removed if the repository  
518 no longer existed. The final set included 1,720 repositories. In addition to the 1,720 repositories  
519 identified through the literature search, we also curated a separate set of 23 high-profile  
520 repositories — highly popular and respected tools in the bioinformatics community — based on  
521 the high volume of posts about these projects on the online forum Biostars [55]. The two

522 datasets are referred to throughout the paper as the “main” and “high-profile” datasets. See  
523 Supplemental Section 2 for details. The repositories are listed in Table S4 and Table S5.

524

### 525 **Extraction of repository data from GitHub API**

526

527 Repository data were extracted from the GitHub REST API v3 [16] and saved to tables on  
528 Google BigQuery [56] for efficient downstream analysis. Data extracted for each repository  
529 include repository-level metrics, file information, file creation dates, file contents, commits, and  
530 licenses. GitHub API responses were obtained using the PycURL library [57]. The JSON  
531 responses were converted to database records and pushed to tables on BigQuery using the  
532 BigQuery-Python library [58]. See Supplemental Section 3 for details.

533

### 534 **Topic modeling of article abstracts**

535

536 We used latent Dirichlet allocation (LDA) [59] to infer topics for abstracts of the articles  
537 announcing each repository in the main dataset. From the LDA model, we identified terms that  
538 were primarily associated with a single topic. We chose a model with eight topics due to its  
539 maximal coherence of concepts within the top topic-specialized terms. We manually assigned a  
540 label to each of the eight topics that captures a summary of the top terms. We then classified  
541 each article abstract into one or more topics. Details are in Supplemental Section 4.

542

### 543 **Programming languages**

544

545 We identified 515,017 total files among the repositories in the main dataset and 22,396  
546 total files in the high-profile dataset. Contents of 425,967 and 18,501 files respectively (349,834  
547 and 16,917 with unique contents) with size under 999KB were saved to tables in BigQuery for

548 further analysis. (See Supplemental Section 3.) We used cloc (Count Lines of Code) version  
549 1.72 [60] to identify the programming language, count lines of code and comments, and extract  
550 comment-stripped source code for each file. A total of 221,343 unique files in the main dataset  
551 and 11,425 in the high-profile dataset had an identifiable programming language. Language  
552 execution modes were obtained from [61]. Type systems were obtained from [62]. Further  
553 details are presented in Supplemental Section 5.

554

### 555 **Developer communities**

556

557 We identified the number of commit authors and outside contributors for each repository. For  
558 commit authors, we attempted to count unique people by collapsing users with the same name  
559 or login. For outside contributors, we counted commit authors whose author ID is never a  
560 committer ID for the repository. The counts of forks, subscribers and stargazers were returned  
561 directly from the GitHub API. Further details are presented in Supplemental Section 6.

562

### 563 **Gender analysis**

564

565 We attempted to infer a gender for each commit author, committer, and article author using the  
566 Genderize.io API [30], which returns a gender call and probability of correctness for a given first  
567 name. Names were first cleaned to remove noise such as single-word handles or organization  
568 names, and then the first word of each cleaned full name was submitted to Genderize. We  
569 accepted gender calls whose reported probability was 0.8 or greater. We proceeded with  
570 analysis of “female” and “male” categories only. We assume that transgender and non-binary  
571 contributors have names that reflect their gender identity. There may be erroneous calls for  
572 individuals who do not identify with a binary gender. The gender calls are also expected to

573 include a few errors for cisgender individuals as we accept calls with global probability of 0.8 or  
574 higher.

575

576 To analyze the gender breakdown of developers, we counted unique full names of authors and  
577 committers. For commits, we joined commit records to genders by the full name of the commit  
578 author and counted individual commits. For paper authors, we counted individual authorships on  
579 papers instead of unique individuals, reasoning that multiple different authorships for the same  
580 individual should be counted separately. We analyzed team composition for the 504 projects in  
581 the main dataset for which we could infer a gender for at least 75% of developers and 75% of  
582 paper authors (Fig S8). We calculated the Shannon index of diversity [32] for the 602  
583 repositories in the main dataset for which we could infer a gender for at least 75% of developers  
584 (Fig S9). Details are described in Supplemental Section 7.

585

### 586 **Commit dynamics**

587

588 We defined project duration as the time span between the first and last commit timestamps for  
589 the repository. Metrics describing monthly activity are with respect to the number of months in  
590 the project duration. We identified the initial commit time for each file by taking the earliest  
591 timestamp of all commits touching the file. Details are described in Supplemental Section 8.

592

### 593 **Proxy for project impact**

594

595 We defined “commits after publication” to be true if the latest commit timestamp at the time we  
596 accessed the data was after the day the associated article appeared in PubMed. Articles were  
597 identified and article metadata were extracted as described in Supplemental Section 2.

598 Repository data were extracted from the GitHub API as described in Supplemental Section 3.

599 Details are described in Supplemental Section 9.

600

### 601 **Availability of data and software**

602

603 All repository data extracted from the GitHub API, except file contents, are available at

604 <https://doi.org/10.17605/OSF.IO/UWHX8>. For file contents, in the absence of explicit open

605 source licenses for the majority of repositories studied, we recorded the Git URL for the specific

606 version of each file so that the exact dataset can be reconstructed using our downstream

607 scripts. Additionally, we have removed personal identifying information from commit records, but

608 have included API references for each commit record so that the full records can be

609 reconstructed. Software to generate the dataset and replicate the results in the paper is

610 available at <https://github.com/pamelarussell/github-bioinformatics>. See Supplemental Section 1

611 for details on the data and software.

612

613

### 614 **Acknowledgements**

615

616 We thank Debashis Ghosh, Wladimir Labeikovskiy, and Matthew Mulvahill for helpful

617 conversations and comments on the manuscript. We thank the GitHub support staff for their

618 effort in determining how we could work within the GitHub Terms of Service to publish a

619 reproducible study.

620

621

### 622 **Author contributions**

623

624 PR: Conceptualization, Data Curation, Formal Analysis, Methodology, Project Administration,  
625 Resources, Software, Supervision, Visualization, Writing - Original Draft Preparation, Writing -  
626 Review & Editing.

627

628 RJ: Data Curation, Writing - Review & Editing.

629

630 SA: Conceptualization, Writing - Review & Editing.

631

632 BH: Data Curation, Investigation, Writing - Original Draft Preparation, Writing - Review &  
633 Editing.

634

635 NC: Funding Acquisition, Project Administration, Supervision, Writing - Review & Editing.

636

637

## 638 **References**

639

640 1. Hagen JB. The origins of bioinformatics. *Nat Rev Genet.* 2000;1: 231–236.  
641 doi:10.1038/35042090

642 2. Lander ES, Linton LM, Birren B, Nusbaum C, Zody MC, Baldwin J, et al. Initial  
643 sequencing and analysis of the human genome. *Nature.* 2001;409: 860–921.  
644 doi:10.1038/35057062

645 3. Scope Guidelines | Bioinformatics | Oxford Academic [Internet]. [cited 19 Mar 2018].  
646 Available: [https://academic.oup.com/bioinformatics/pages/scope\\_guidelines](https://academic.oup.com/bioinformatics/pages/scope_guidelines)

647 4. Searls DB. The roots of bioinformatics. *PLoS Comput Biol.* 2010;6: e1000809.  
648 doi:10.1371/journal.pcbi.1000809

649 5. Computational biology and bioinformatics - Latest research and news | Nature [Internet].  
650 7 Mar 2018 [cited 24 Mar 2018]. Available: [https://www.nature.com/subjects/computational-](https://www.nature.com/subjects/computational-biology-and-bioinformatics)  
651 [biology-and-bioinformatics](https://www.nature.com/subjects/computational-biology-and-bioinformatics)

- 652 6. Hothorn T, Leisch F. Case studies in reproducibility. *Brief Bioinform.* 2011;12: 288–300.  
653 doi:10.1093/bib/bbq084
- 654 7. Sandve GK, Nekrutenko A, Taylor J, Hovig E. Ten simple rules for reproducible  
655 computational research. *PLoS Comput Biol.* 2013;9: e1003285.  
656 doi:10.1371/journal.pcbi.1003285
- 657 8. Seemann T. Ten recommendations for creating usable bioinformatics command line  
658 software. *Gigascience.* 2013;2: 15. doi:10.1186/2047-217X-2-15
- 659 9. Leprevost F da V, Barbosa VC, Francisco EL, Perez-Riverol Y, Carvalho PC. On best  
660 practices in the development of bioinformatics software. *Front Genet.* 2014;5: 199.  
661 doi:10.3389/fgene.2014.00199
- 662 10. Git [Internet]. [cited 24 Mar 2018]. Available: <https://git-scm.com/>
- 663 11. Stack Overflow Developer Survey 2018. In: Stack Overflow [Internet]. [cited 18  
664 Mar 2018]. Available: <https://insights.stackoverflow.com/survey/2018/>
- 665 12. Build software better, together [Internet]. Github; Available: <https://github.com>
- 666 13. GitHub Octoverse 2017 [Internet]. Github; Available:  
667 <https://octoverse.github.com/>
- 668 14. Blischak JD, Davenport ER, Wilson G. A Quick Introduction to Version Control  
669 with Git and GitHub. *PLoS Comput Biol.* 2016;12: e1004668.  
670 doi:10.1371/journal.pcbi.1004668
- 671 15. Instructions for Authors | Bioinformatics | Oxford Academic [Internet]. [cited 27  
672 Apr 2018]. Available:  
673 [https://academic.oup.com/bioinformatics/pages/instructions\\_for\\_authors](https://academic.oup.com/bioinformatics/pages/instructions_for_authors)
- 674 16. GitHub API v3 | GitHub Developer Guide [Internet]. Github; Available:  
675 <https://developer.github.com/v3/>
- 676 17. GitHub Terms of Service - User Documentation [Internet]. Github; Available:  
677 <https://help.github.com/articles/github-terms-of-service/>
- 678 18. Ray B, Posnett D, Filkov V, Devanbu P. A large scale study of programming  
679 languages and code quality in github. *Proceedings of the 22nd ACM SIGSOFT*  
680 *International Symposium on Foundations of Software Engineering.* ACM; 2014. pp. 155–  
681 165. doi:10.1145/2635868.2635922
- 682 19. Kochhar PS, Bissyandé TF, Lo D, Jiang L. An Empirical Study of Adoption of  
683 Software Testing in Open Source Projects. 2013 13th International Conference on Quality  
684 Software. 2013. pp. 103–112. doi:10.1109/QSIC.2013.57
- 685 20. Hu Y, Zhang J, Bai X, Yu S, Yang Z. Influence analysis of Github repositories.  
686 *Springerplus.* 2016;5: 1268. doi:10.1186/s40064-016-2897-7
- 687 21. Borges H, Hora A, Valente MT. Understanding the Factors that Impact the  
688 Popularity of GitHub Repositories [Internet]. *arXiv [cs.SE].* 2016. Available:  
689 <http://arxiv.org/abs/1606.04984>

- 690 22. Blincoe K, Sheoran J, Goggins S, Petakovic E, Damian D. Understanding the  
691 popular users: Following, affiliation influence and leadership on GitHub. *Information and*  
692 *Software Technology*. 2016;2;70: 30–39. Available:  
693 <http://www.sciencedirect.com/science/article/pii/S0950584915001688>
- 694 23. Ma W, Chen L, Zhou Y, Xu B. What Are the Dominant Projects in the GitHub  
695 Python Ecosystem? 2016 Third International Conference on Trustworthy Systems and their  
696 Applications (TSA). 2016. pp. 87–95. doi:10.1109/TSA.2016.23
- 697 24. Sheoran J, Blincoe K, Kalliamvakou E, Damian D, Ell J. Understanding  
698 “Watchers” on GitHub. *Proceedings of the 11th Working Conference on Mining Software*  
699 *Repositories*. New York, NY, USA: ACM; 2014. pp. 336–339.  
700 doi:10.1145/2597073.2597114
- 701 25. Spotlight on Bioinformatics. *NatureJobs*. Nature Publishing Group; 2016;  
702 doi:10.1038/nj0478
- 703 26. Blei DM. Probabilistic Topic Models. *Commun ACM*. New York, NY, USA: ACM;  
704 2012;55: 77–84. doi:10.1145/2133806.2133826
- 705 27. McGill R, Tukey JW, Larsen WA. Variations of Box Plots. *Am Stat*. [American  
706 Statistical Association, Taylor & Francis, Ltd.]; 1978;32: 12–16. doi:10.2307/2683468
- 707 28. Boost C++ Libraries [Internet]. [cited 18 Mar 2018]. Available:  
708 <http://www.boost.org/>
- 709 29. Babraham Bioinformatics - FastQC A Quality Control tool for High Throughput  
710 Sequence Data [Internet]. [cited 18 Mar 2018]. Available:  
711 <http://www.bioinformatics.babraham.ac.uk/projects/fastqc/>
- 712 30. Strømgren C. Genderize.io | Determine the gender of a first name [Internet].  
713 [cited 25 Jan 2018]. Available: <https://genderize.io/>
- 714 31. Bonham KS, Stefan MI. Women are underrepresented in computational biology:  
715 An analysis of the scholarly literature in biology, computer science and computational  
716 biology. *PLoS Comput Biol*. 2017;13: e1005134. doi:10.1371/journal.pcbi.1005134
- 717 32. Shannon CE. A mathematical theory of communication. *The Bell System*  
718 *Technical Journal*. 1948;27: 379–423. doi:10.1002/j.1538-7305.1948.tb01338.x
- 719 33. GitHub Privacy Statement - User Documentation [Internet]. Github; Available:  
720 <https://help.github.com/articles/github-privacy-statement/>
- 721 34. National Science Foundation, National Center for Science and Engineering  
722 Statistics. Doctorate Recipients from U.S. Universities: 2016 [Internet]. Alexandria, VA.:  
723 National Science Foundation; 2017. Report No.: Special Report NSF 18-304. Available:  
724 <https://www.nsf.gov/statistics/2018/nsf18304/>
- 725 35. Ortu M, Destefanis G, Counsell S, Swift S, Tonelli R, Marchesi M. How diverse is  
726 your team? Investigating gender and nationality diversity in GitHub teams. *J Softw Eng Res*  
727 *Dev*. Springer Berlin Heidelberg; 2017;5: 9. doi:10.1186/s40411-017-0044-y
- 728 36. Nielsen MW, Alegria S, Börjeson L, Etkowitz H, Falk-Krzesinski HJ, Joshi A, et



- 729 al. Opinion: Gender diversity leads to better science. *Proc Natl Acad Sci U S A*. 2017;114:  
730 1740–1742. doi:10.1073/pnas.1700616114
- 731 37. Vasilescu B, Posnett D, Ray B, van den Brand MGJ, Serebrenik A, Devanbu P,  
732 et al. Gender and Tenure Diversity in GitHub Teams. *Proceedings of the 33rd Annual ACM*  
733 *Conference on Human Factors in Computing Systems*. New York, NY, USA: ACM; 2015.  
734 pp. 3789–3798. doi:10.1145/2702123.2702549
- 735 38. Gentleman RC, Carey VJ, Bates DM, Bolstad B, Dettling M, Dudoit S, et al.  
736 *Bioconductor: open software development for computational biology and bioinformatics*.  
737 *Genome Biol*. 2004;5: R80. doi:10.1186/gb-2004-5-10-r80
- 738 39. Prlić A, Yates A, Bliven SE, Rose PW, Jacobsen J, Troshin PV, et al. *BioJava: an*  
739 *open-source framework for bioinformatics in 2012*. *Bioinformatics*. 2012;28: 2693–2695.  
740 doi:10.1093/bioinformatics/bts494
- 741 40. Cock PJA, Antao T, Chang JT, Chapman BA, Cox CJ, Dalke A, et al. *Biopython:*  
742 *freely available Python tools for computational molecular biology and bioinformatics*.  
743 *Bioinformatics*. 2009;25: 1422–1423. doi:10.1093/bioinformatics/btp163
- 744 41. bioRxiv.org - the preprint server for Biology [Internet]. [cited 24 Mar 2018].  
745 Available: <https://www.biorxiv.org/>
- 746 42. Kamali AH, Giannoulatou E, Chen TY, Charleston MA, McEwan AL, Ho JWK.  
747 *How to test bioinformatics software?* *Biophys Rev*. 2015;7: 343–352. doi:10.1007/s12551-  
748 015-0177-3
- 749 43. Yang A, Troup M, Ho JWK. *Scalability and Validation of Big Data Bioinformatics*  
750 *Software*. *Comput Struct Biotechnol J*. 2017;15: 379–386. doi:10.1016/j.csbj.2017.07.002
- 751 44. Chen TY, Ho JWK, Liu H, Xie X. *An innovative approach for testing*  
752 *bioinformatics programs using metamorphic testing*. *BMC Bioinformatics*. 2009;10: 24.  
753 doi:10.1186/1471-2105-10-24
- 754 45. Duck G, Nenadic G, Filannino M, Brass A, Robertson DL, Stevens R. *A Survey*  
755 *of Bioinformatics Database and Software Usage through Mining the Literature*. *PLoS One*.  
756 2016;11: e0157989. doi:10.1371/journal.pone.0157989
- 757 46. *The Software Sustainability Institute | Software Sustainability Institute* [Internet].  
758 [cited 2 May 2018]. Available: <https://www.software.ac.uk/>
- 759 47. *The Software Sustainability Institute: changing research software attitudes and*  
760 *practices | Software Sustainability Institute* [Internet]. [cited 2 May 2018]. Available:  
761 [https://www.software.ac.uk/software-sustainability-institute-changing-research-software-](https://www.software.ac.uk/software-sustainability-institute-changing-research-software-attitudes-and-practices)  
762 [attitudes-and-practices](https://www.software.ac.uk/software-sustainability-institute-changing-research-software-attitudes-and-practices)
- 763 48. *Better Scientific Software* [Internet]. [cited 2 May 2018]. Available:  
764 <https://bssw.io/pages/about>
- 765 49. *Software Carpentry*. In: *Software Carpentry* [Internet]. [cited 2 May 2018].  
766 Available: <https://software-carpentry.org/>
- 767 50. Wilson G. *Software Carpentry: Getting Scientists to Write Better Code by Making*

- 768 Them More Productive. Computing in Science and Engg. Piscataway, NJ, USA: IEEE  
769 Educational Activities Department; 2006;8: 66–69. doi:10.1109/MCSE.2006.122
- 770 51. Wilson G. Software Carpentry: lessons learned. F1000Res. 2014;3.  
771 doi:10.12688/f1000research.3-62.v1
- 772 52. Wilson G, Aruliah DA, Brown CT, Chue Hong NP, Davis M, Guy RT, et al. Best  
773 practices for scientific computing. PLoS Biol. 2014;12: e1001745.  
774 doi:10.1371/journal.pbio.1001745
- 775 53. Crusoe MR, Brown CT. Walking the Talk: Adopting and Adapting Sustainable  
776 Scientific Software Development processes in a Small Biology Lab. J Open Res Softw.  
777 2016;4. doi:10.5334/jors.35
- 778 54. Goble C. Better Software, Better Research. IEEE Internet Comput. 2014;18: 4–8.  
779 doi:10.1109/MIC.2014.88
- 780 55. Parnell LD, Lindenbaum P, Shameer K, Dall'Olio GM, Swan DC, Jensen LJ, et  
781 al. BioStar: an online question & answer resource for the bioinformatics community. PLoS  
782 Comput Biol. 2011;7: e1002216. doi:10.1371/journal.pcbi.1002216
- 783 56. BigQuery - Analytics Data Warehouse | Google Cloud Platform. In: Google Cloud  
784 Platform [Internet]. [cited 19 Mar 2018]. Available: <https://cloud.google.com/bigquery/>
- 785 57. Kjetil Jacobsen MFXJO. PycURL Home Page [Internet]. [cited 19 Mar 2018].  
786 Available: <http://pycurl.io/>
- 787 58. Treat T. BigQuery-Python [Internet]. Github; Available:  
788 <https://github.com/tylertreat/BigQuery-Python>
- 789 59. Blei DM, Ng AY, Jordan MI. Latent Dirichlet Allocation. J Mach Learn Res.  
790 2003;3: 993–1022. Available: <http://www.jmlr.org/papers/volume3/blei03a/blei03a.pdf>
- 791 60. cloc [Internet]. Github; Available: <https://github.com/AIDanial/cloc>
- 792 61. Wikipedia contributors. List of programming languages by type. In: Wikipedia,  
793 The Free Encyclopedia [Internet]. 12 Dec 2017 [cited 15 Mar 2018]. Available:  
794 [https://en.wikipedia.org/w/index.php?title=List\\_of\\_programming\\_languages\\_by\\_type&oldid=](https://en.wikipedia.org/w/index.php?title=List_of_programming_languages_by_type&oldid=814994307)  
795 [814994307](https://en.wikipedia.org/w/index.php?title=List_of_programming_languages_by_type&oldid=814994307)
- 796 62. Wikipedia contributors. Comparison of type systems. In: Wikipedia, The Free  
797 Encyclopedia [Internet]. 5 Sep 2017 [cited 15 Mar 2018]. Available:  
798 [https://en.wikipedia.org/w/index.php?title=Comparison\\_of\\_type\\_systems&oldid=799049191](https://en.wikipedia.org/w/index.php?title=Comparison_of_type_systems&oldid=799049191)

799

## 800 **Supporting information captions**

801

## 802 **Supplemental Information. Supplemental information, methods, and figures.**

803

804 **Table S1. Definition of bioinformatics topics.**

805

806 **Table S2. Manual classification of articles as bioinformatics or not.**

807

808 **Table S3. Automatic identification of GitHub repository names in articles.**

809

810 **Table S4. Manual curation of GitHub repository names.**

811

812 **Table S5. High-profile repositories.**

813

814 **Table S6. Programming language type systems.**

815

816 **Table S7. Programming language execution modes.**

817

818 **Table S8. Calculated repository features.**

819
